# Supplementary material for: Extracellular Vesicle Enriched miR-625-3p Is Associated with Survival of Malignant Mesothelioma Patients
Source: MDPI journal article supplement (doi:10.3390/jpm11101014), 2021-10-09
Supplement: s1 [file s1]

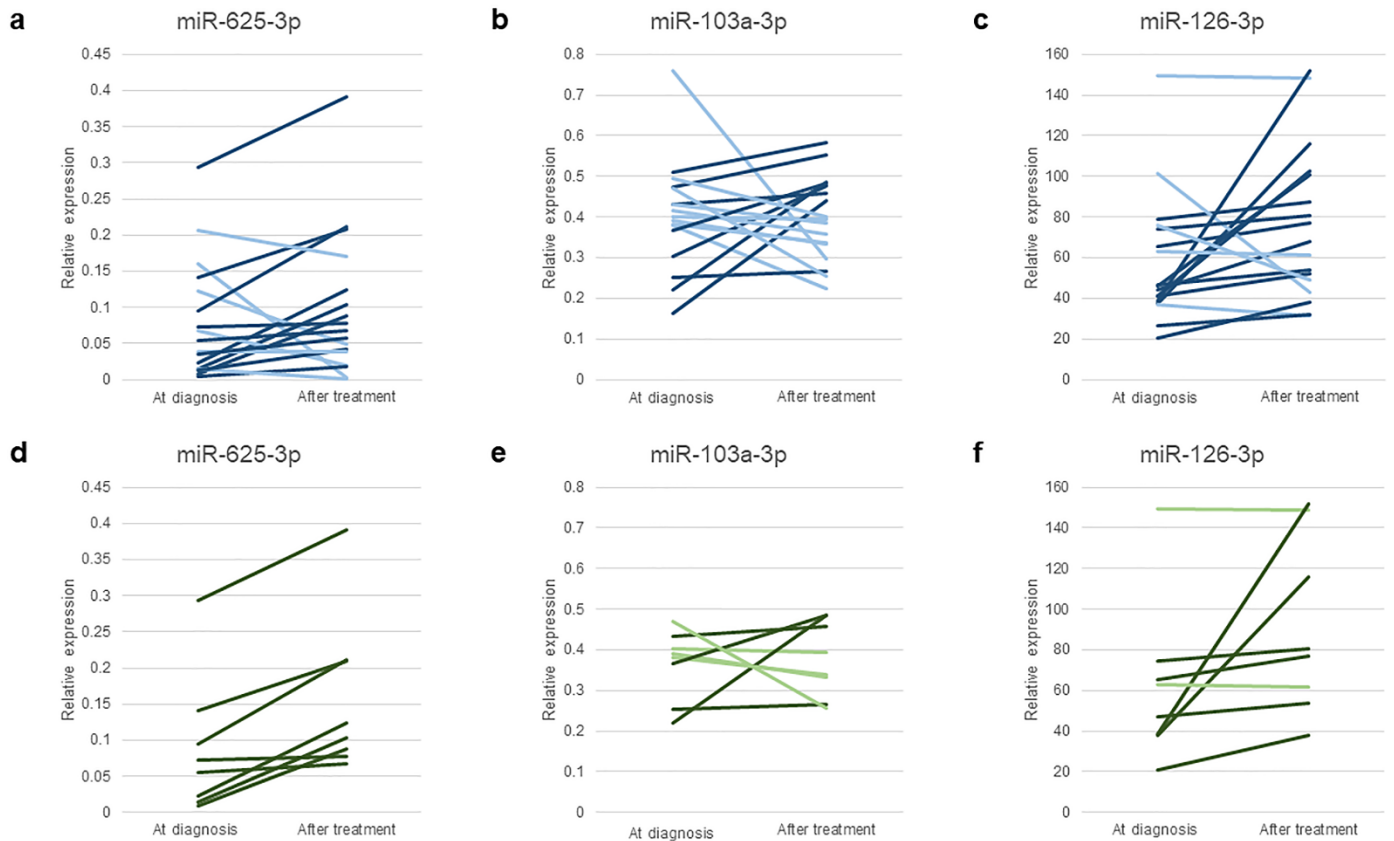

**Figure S1:** Comparison of expression of serum EV-enriched miRNAs at diagnosis and after treatment in each malignant mesothelioma patient in the whole study group (a: miR-625-3p, b: miR-103a-3p, c: miR-126-3p; dark blue: increased expression, light blue: decreased expression) and in each patient with poor treatment outcome (d: miR-625-3p, e: miR-103a-3p, f: miR-126-3p; dark green: increased expression, light green: decreased expression). EV: extracellular vesicles

**Table S1:** Expression of serum EV-enriched miRNAs and progression-free survival (PFS) and overall survival (OS) of malignant mesothelioma patients.

|                     | miRNA       | PFS  |               |              |      |                         |                  | OS   |               |              |      |                         |                  |
|---------------------|-------------|------|---------------|--------------|------|-------------------------|------------------|------|---------------|--------------|------|-------------------------|------------------|
|                     |             | HR   | (95% CI)      | P            | HR   | (95% CI) <sub>adj</sub> | P <sub>adj</sub> | HR   | (95% CI)      | P            | HR   | (95% CI) <sub>adj</sub> | P <sub>adj</sub> |
| At diagnosis (N=18) | miR-625-3p  | 0.33 | (0.00-340.58) | 0.755        | 1.74 | (0.00-4333.43)          | 0.890            | 0.06 | (0.00-393.16) | 0.535        | 3.60 | (0.00-69206.36)         | 0.799            |
|                     | miR-103a-3p | 0.35 | (0.01-8.61)   | 0.520        | 0.26 | (0.01-7.00)             | 0.421            | 0.28 | (0.01-14.32)  | 0.529        | 0.13 | (0.00-7.02)             | 0.319            |
|                     | miR-126-3p  | 1.01 | (0.99-1.02)   | 0.533        | 1.01 | (0.99-1.02)             | 0.531            | 1.01 | (0.99-1.03)   | 0.192        | 1.01 | (0.99-1.03)             | 0.233            |
| Change (%)* (N=17)  | miR-625-3p  | 1.02 | (1.00-1.04)   | <b>0.044</b> | 1.02 | (1.00-1.04)             | <b>0.046</b>     | 1.02 | (1.00-1.05)   | <b>0.045</b> | 1.03 | (1.00-1.05)             | <b>0.042</b>     |
|                     | miR-103a-3p | 0.99 | (0.91-1.07)   | 0.714        | 0.99 | (0.91-1.07)             | 0.742            | 1.01 | (0.92-1.10)   | 0.847        | 1.02 | (0.93-1.11)             | 0.725            |
|                     | miR-126-3p  | 1.01 | (0.96-1.07)   | 0.642        | 1.02 | (0.96-1.09)             | 0.482            | 1.00 | (0.93-1.08)   | 0.994        | 1.03 | (0.95-1.12)             | 0.458            |

adj: adjusted for C-reactive protein levels at diagnosis

\*HR values are reported for a difference of 10%

CI: confidence interval; EV: extracellular vesicles; HR: hazard ratio
